# Supplementary material for: Development and validation of prediction models for incident atrial fibrillation in heart failure
Source: HighWire-hosted journal article supplement (doi:10.1136/openhrt-2022-002169), 2023-01-01
Supplement: openhrt-2022-002169supp001_data_supplement.pdf [file openhrt-2022-002169supp001_data_supplement.pdf]

## **Supplemental Material**

### **Development and validation of prediction models for incident atrial fibrillation in heart failure**

Nicklas Vinter, Thomas Alexander Gerds, Pia Cordsen, Jan Brink Valentin, Gregory Y.H. Lip, Emelia J. Benjamin, Søren Paaske Johnsen, and Lars Frost

|                                                                                                                                                          |          |
|----------------------------------------------------------------------------------------------------------------------------------------------------------|----------|
| <b>Methods</b> .....                                                                                                                                     | <b>2</b> |
| <a href="#">Supplemental Table 1. Diagnoses</a> .....                                                                                                    | 2        |
| <a href="#">Supplemental Table 2. Definition of candidate predictors</a> .....                                                                           | 3        |
| <a href="#">Supplemental Figure 1. The prespecified Delphi method to select predictors</a> .....                                                         | 7        |
| <b>Results</b> .....                                                                                                                                     | <b>8</b> |
| <a href="#">Supplemental Table 3. Risk of atrial fibrillation (AF) and mortality at 1 year after heart failure (HF) by year of HF diagnosis</a> .....    | 8        |
| <a href="#">Supplemental Table 4. Characteristics of complete cases based on selected variables by experts</a> .....                                     | 9        |
| <a href="#">Supplemental Table 5. Characteristics of complete cases based on selected variables by experts and patients diagnosed in 2008-2017</a> ..... | 11       |
| <a href="#">Supplemental Figure 2. Flowchart</a> .....                                                                                                   | 13       |
| <a href="#">Supplemental Figure 3. Results of first Delphi Round</a> .....                                                                               | 14       |
| <a href="#">Supplemental Figure 4. Risk prediction of death</a> .....                                                                                    | 15       |

**Vinter et al. Prediction models for incident AF in chronic HF****Methods****Supplemental Table 1. Diagnoses.**

|                                 | <b>ICD-10</b> | <b>ICD-8</b> |
|---------------------------------|---------------|--------------|
| Atrial fibrillation and flutter | I48           | 42793 42794  |

## Vinter et al. Prediction models for incident AF in chronic HF

Supplemental Table 2. Definition of candidate predictors.

| Category            | Predictor                          | Time window                                 | Coding                                                                                                                                                                         | Primary source | Secondary source | ICD 10 | ICD 8 | Procedure code | ATC |
|---------------------|------------------------------------|---------------------------------------------|--------------------------------------------------------------------------------------------------------------------------------------------------------------------------------|----------------|------------------|--------|-------|----------------|-----|
| Demographic factors | Age                                | At HF onset                                 | Continuous                                                                                                                                                                     | DHFR           | -                | -      | -     | -              | -   |
|                     | Sex                                | -                                           | Men                                                                                                                                                                            | DHFR           | -                | -      | -     | -              | -   |
|                     |                                    |                                             | Women                                                                                                                                                                          |                |                  |        |       |                |     |
| Level of education  | At HF onset                        | Group 1<br>Group 2<br>Group 3               | DST                                                                                                                                                                            | -              | -                | -      | -     | -              |     |
| Health behaviors    | Elevated alcohol intake            | At HF onset                                 | W: >14 drinks/week and >7* drinks/week<br>M: >21 drinks/week and >14* drinks/week<br>W: ≤14 drinks/week and ≤7 drinks per week<br>M: ≤21* drinks/week and ≤7* drinks per week, | DHFR           | -                | -      | -     | -              | -   |
|                     | Smoking status                     | At HF onset                                 | Current<br>Former<br>Never                                                                                                                                                     | DHFR           | -                | -      | -     | -              | -   |
| Clinical data       | Left ventricular ejection fraction | Between 6 months before and 7 days after HF | ≥50%<br>>40-49%<br>25-40%<br><25%                                                                                                                                              | DHFR           | -                | -      | -     | -              | -   |
|                     | NYHA classification                | At HF onset or up to 12 weeks after         | I<br>II<br>III/IV                                                                                                                                                              | DHFR           | -                | -      | -     | -              | -   |

## Vinter et al. Prediction models for incident AF in chronic HF

| Category                         | Predictor                             | Time window                                                                                                       | Coding | Primary source | Secondary source | ICD 10                                                                                                                          | ICD 8                             | Procedure code               | ATC                                                                                                                                                                                                                                                                                                                                                                                                                            |
|----------------------------------|---------------------------------------|-------------------------------------------------------------------------------------------------------------------|--------|----------------|------------------|---------------------------------------------------------------------------------------------------------------------------------|-----------------------------------|------------------------------|--------------------------------------------------------------------------------------------------------------------------------------------------------------------------------------------------------------------------------------------------------------------------------------------------------------------------------------------------------------------------------------------------------------------------------|
| Comorbidities and health factors | Treatment for hypertension            | ICD: ever for missing data, since date of heart failure diagnosis for non-hypertensive patients.<br>ATC: 6 months | Yes/no | DHFR           | NPR              | I10 I11 I12 I13 I15                                                                                                             | 400 401<br>402 403<br>404         | -                            | Classes of antihypertensive drugs:<br><i>α adrenergic blockers</i> : C02A; C02B; C02C<br><br><i>Non-loop diuretics</i> : C02DA; C02L; C03A; C03B; C03D; C03E; C03X; C07B; C07C; C07D; C08G; C09BA; C09DA; C09XA52<br><br><i>Vasodilators</i> : C02DB; C02DD; C02DG; C04; C05<br><br><i>β blockers</i> : C07<br><br><i>Calcium channel blockers</i> : C08; C09BB; C09DB<br><br><i>Renin-angiotensin system inhibitors</i> : C09 |
|                                  | Hypercholesterolemia                  | Ever before HF onset                                                                                              | Yes/no | NPR            | -                | E780                                                                                                                            | 27200<br>27900                    | -                            | -                                                                                                                                                                                                                                                                                                                                                                                                                              |
|                                  | Diabetes mellitus                     | ICD: ever<br>ATC: 6 months                                                                                        | Yes/no | NPR            | -                | E100 E101 E109<br>E110 E111 E119                                                                                                | 249 250                           | -                            | A10                                                                                                                                                                                                                                                                                                                                                                                                                            |
|                                  | Chronic kidney disease                | Ever before HF onset                                                                                              | Yes/no | NPR            | -                | E102 E112 E142<br>I120 I131 I132<br>I150 I151 N03<br>N05 N06 N07 N08<br>N110 N14 N15<br>N16 N18 N19 N26<br>N27 N280 N391<br>Q61 | -                                 | -                            | -                                                                                                                                                                                                                                                                                                                                                                                                                              |
|                                  | Obstructive sleep apnea               | Ever before HF onset                                                                                              | Yes/no | NPR            | -                | G473                                                                                                                            | -                                 | -                            | -                                                                                                                                                                                                                                                                                                                                                                                                                              |
|                                  | Chronic obstructive pulmonary disease | Ever before HF onset                                                                                              | Yes/no | NPR            | -                | J44                                                                                                                             | -                                 | -                            | -                                                                                                                                                                                                                                                                                                                                                                                                                              |
|                                  | Valvular disease                      | Ever before HF onset                                                                                              | Yes/no | NPR            | -                | I05-I08 I34-I37<br>Z952                                                                                                         | 39400-<br>39600,<br>4240,<br>4241 | KFJE, KFJF, KFG, KFK,<br>KFM | -                                                                                                                                                                                                                                                                                                                                                                                                                              |
|                                  | Myocardial infarction                 | Ever before HF onset                                                                                              | Yes/no | NPR            | -                | I21 I22 I23                                                                                                                     | 410                               | -                            | -                                                                                                                                                                                                                                                                                                                                                                                                                              |
|                                  | Peripheral artery disease             | Ever before HF onset                                                                                              | Yes/no | PNR            | -                | I70 I71 I73 I74                                                                                                                 | 440 441<br>442 443<br>444 445     | -                            | -                                                                                                                                                                                                                                                                                                                                                                                                                              |

## Vinter et al. Prediction models for incident AF in chronic HF

| Category | Predictor                           | Time window                                                                        | Coding | Primary source | Secondary source | ICD 10                                                                                                                                | ICD 8                                                       | Procedure code                                                                                                                                                                              | ATC  |
|----------|-------------------------------------|------------------------------------------------------------------------------------|--------|----------------|------------------|---------------------------------------------------------------------------------------------------------------------------------------|-------------------------------------------------------------|---------------------------------------------------------------------------------------------------------------------------------------------------------------------------------------------|------|
|          | Hyperthyroidism                     | ICD: At HF onset and 6 months before.<br><br>ATC: AT HF onset and 6 months before. | Yes/no | NPR or DPR     | -                | E05 E06                                                                                                                               | 24200<br>24208<br>24209<br>24219<br>24220<br>24228<br>24229 | -                                                                                                                                                                                           | H03B |
|          | Ischemic stroke                     | Ever before HF onset                                                               | Yes/no | NPR            | -                | I63<br>I64                                                                                                                            | 433 434                                                     | -                                                                                                                                                                                           | -    |
|          | Systemic embolism                   | Ever before HF onset                                                               | Yes/no | NPR            | -                | I74                                                                                                                                   | 444                                                         | -                                                                                                                                                                                           | -    |
|          | Sepsis                              | Up 1 months before HF                                                              |        | NPR            | -                | A021<br>A282B<br>A267<br>A327<br>A392<br>A394<br>A400<br>A401<br>A402<br>A403<br>A408<br>A409<br>A41<br>A427<br>A499A<br>B377<br>R572 | -                                                           | -                                                                                                                                                                                           | -    |
|          | Pneumonia                           | Up 1 months before HF                                                              | Yes/no | NPR            | -                | J12 J13 J14 J15<br>J16 J17 J18                                                                                                        | -                                                           | -                                                                                                                                                                                           | -    |
|          | Pulmonary embolism                  | Up 1 months before HF                                                              | Yes/no | NPR            | -                | I26                                                                                                                                   | -                                                           | -                                                                                                                                                                                           | -    |
|          | Acute respiratory distress syndrome | Up 1 months before HF                                                              | Yes/no | NPR            | -                | J809                                                                                                                                  | -                                                           | -                                                                                                                                                                                           | -    |
|          | Admitted to intensive care unit     | Up 1 months before HF                                                              | Yes/no | NPR            | -                | -                                                                                                                                     | -                                                           | NABE or NABB                                                                                                                                                                                | -    |
|          | Surgery                             | Up 1 months before HF                                                              | Yes/no | NPR            | -                | -                                                                                                                                     | -                                                           | Bypass: KFNA, KFNB, KFNC, KFND, KFNE, KFNF, KFNH, KFNJ, KFNK, KFNW<br><br>Valve: KFJE, KFJF, KFG, KFK, KFM<br><br>Lung resection: KGDC, KGDD<br><br>Esophagogastrostomy: KJCB, KJCD, KJDC40 | -    |

## Vinter et al. Prediction models for incident AF in chronic HF

| Category     | Predictor              | Time window                       | Coding | Primary source | Secondary source | ICD 10              | ICD 8 | Procedure code | ATC                |
|--------------|------------------------|-----------------------------------|--------|----------------|------------------|---------------------|-------|----------------|--------------------|
|              | Cancer                 | 6 months prior to diagnosis of HF | Yes/no | NPR            | -                | C00-C96, except C44 | -     | -              | -                  |
| Medication** | ACE-inhibitors/ARBs    | 6 months prior to diagnosis of HF | Yes/no | DPR            | -                | -                   | -     | -              | C09                |
|              | Beta-blockers          | 6 months prior to diagnosis of HF | Yes/no | DPR            | -                | -                   | -     | -              | C07                |
|              | MRAs                   | 6 months prior to diagnosis of HF | Yes/no | DPR            | -                | -                   | -     | -              | C03DA              |
|              | Statins                | 6 months prior to diagnosis of HF | Yes/no | DPR            | -                | -                   | -     | -              | C10                |
|              | Aspirin or clopidogrel | 6 months prior to diagnosis of HF | Yes/no | DPR            |                  |                     |       |                | B01AC06<br>B01AC04 |
|              | NSAID                  | 6 months prior to diagnosis of HF | Yes/no | DPR            |                  |                     |       |                | M01A               |

Abbreviations: DHFR= Danish Heart Failure Registry; DST= Statistics Denmark; NPR = Danish National Patient Registry; DPR=Danish Prescription Registry

\*After July 1, 2015.

\*\*Defined as at least 1 prescription within 3 months prior to the diagnosis of HF.

Hypertension: Among patients without hypertension or missing in the DHR, we updated the variable using DNPR, including an ICD code or at least 2 types of medication.

Hyperthyroidism: A diagnosis within 6 months or a prescription within 6 months.

Vinter et al. Prediction models for incident AF in HF

Supplemental Figure 1. The prespecified Delphi method to select predictors.

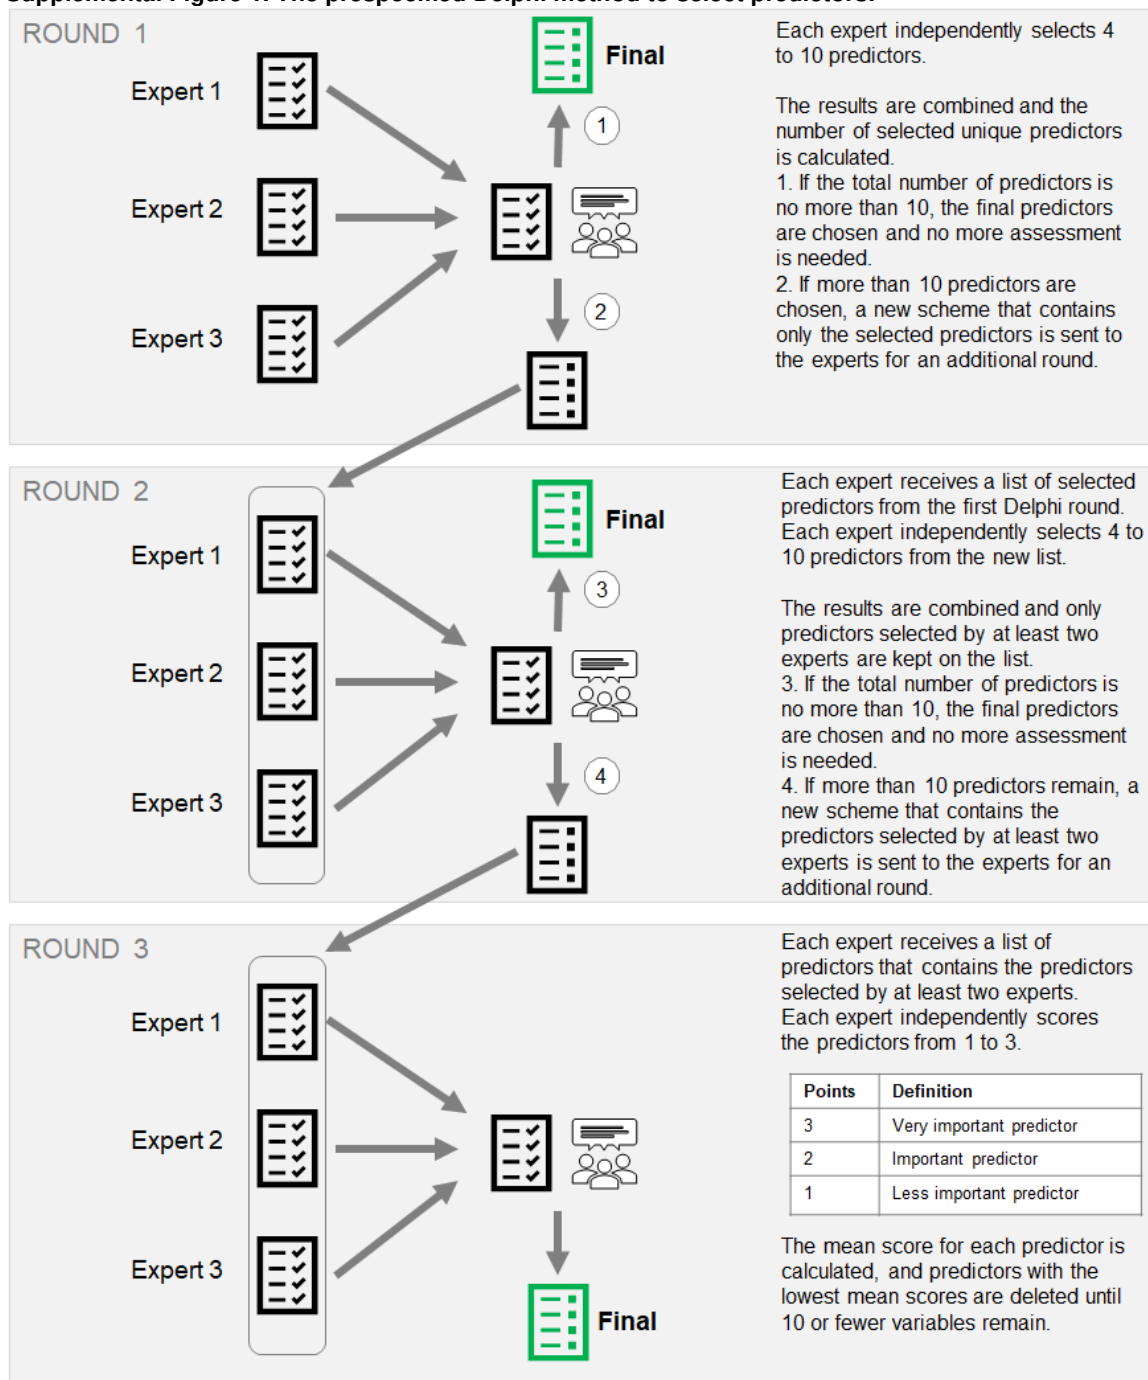

**Vinter et al. Prediction models for incident AF in HF****Results****Supplemental Table 3. Risk of atrial fibrillation (AF) and mortality at 1 year after heart failure (HF) by year of HF diagnosis.**

| <b>Year of HF diagnosis</b> | <b>One-year risk of AF, %</b> | <b>One-year mortality, %</b> |
|-----------------------------|-------------------------------|------------------------------|
| 2008                        | 6.8                           | 9.2                          |
| 2009                        | 6.5                           | 9.9                          |
| 2010                        | 6.4                           | 9.5                          |
| 2011                        | 7.4                           | 9.1                          |
| 2012                        | 8.5                           | 9.2                          |
| 2013                        | 7.1                           | 9.6                          |
| 2014                        | 8.8                           | 9.0                          |
| 2015                        | 8.3                           | 7.7                          |
| 2016                        | 8.6                           | 8.3                          |
| 2017                        | 8.7                           | 9.4                          |



## Vinter et al. Prediction models for incident AF in HF

Supplemental Table 4. Characteristics of complete cases based on selected variables by experts.

|                                                | Total<br>N=25,289 | Development data<br>N=13,009 | Validation data<br>N=12,280 |
|------------------------------------------------|-------------------|------------------------------|-----------------------------|
| <b>Demography</b>                              |                   |                              |                             |
| Female sex, N (%)                              | 8,243 (32.6)      | 4,248 (32.7)                 | 3,995 (32.5)                |
| Age, years, mean (SD)                          | 67.9 (12.9)       | 68.0 (13.0)                  | 67.9 (12.8)                 |
| Highest completed education, N (%)             |                   |                              |                             |
| Group 1                                        | 10,478 (42.9)     | 5,664 (45.5)                 | 4,814 (40.2)                |
| Group 2                                        | 10,167 (41.6)     | 4,993 (40.1)                 | 5,174 (43.2)                |
| Group 3                                        | 3,799 (15.5)      | 1,802 (14.5)                 | 1,997 (16.7)                |
| <b>Lifestyle factors, N (%)</b>                |                   |                              |                             |
| Elevated alcohol consumption                   | 2,010 (9.0)       | 992 (8.8)                    | 1,018 (9.2)                 |
| Smoking status                                 |                   |                              |                             |
| Never                                          | 6,075 (25.8)      | 2,928 (24.5)                 | 3,147 (27.1)                |
| Former                                         | 10,191 (43.3)     | 5,099 (42.7)                 | 5,092 (43.9)                |
| Current                                        | 7,284 (30.9)      | 3,925 (32.8)                 | 3,359 (29.0)                |
| <b>Clinical Data, N (%)</b>                    |                   |                              |                             |
| Left ventricular ejection fraction             |                   |                              |                             |
| <25%                                           | 5,993 (23.9)      | 2,914 (22.8)                 | 3,079 (25.2)                |
| 25-40%                                         | 15,930 (63.6)     | 0,049 (62.9)                 | 7,881 (64.4)                |
| >40-49%                                        | 1,549 (6.2)       | 957 (7.5)                    | 592 (4.8)                   |
| ≥50%                                           | 1,571 (6.3)       | 880 (6.9)                    | 691 (5.6)                   |
| NYHA class                                     |                   |                              |                             |
| I                                              | 4,061 (16.1)      | 2,028 (15.6)                 | 2,033 (16.6)                |
| II                                             | 15,264 (60.4)     | 7,645 (58.8)                 | 7,619 (62.0)                |
| III/IV                                         | 5,964 (23.6)      | 3,336 (25.6)                 | 2,628 (21.4)                |
| <b>Comorbidities and health factors, N (%)</b> |                   |                              |                             |
| Hypertension                                   | 10,593 (41.9)     | 5,119 (60.7)                 | 6,806 (55.4)                |
| Hypercholesterolemia                           | 5,225 (20.7)      | 2,750 (21.1)                 | 2,475 (20.1)                |
| Diabetes mellitus                              | 5,112 (20.2)      | 2,639 (20.3)                 | 2,473 (20.1)                |
| Chronic kidney disease                         | 1,789 (7.1)       | 878 (7.8)                    | 911 (7.4)                   |
| Obstructive sleep apnea                        | 590 (2.3)         | 222 (1.7)                    | 368 (3.0)                   |
| Chronic obstructive pulmonary disease          | 3,138 (12.4)      | 1,623 (12.5)                 | 1,515 (12.3)                |
| Valvular heart disease                         | 2,239 (8.9)       | 1,173 (9.0)                  | 1,066 (8.7)                 |
| Myocardial infarction                          | 9,801 (38.8)      | 5,311 (40.8)                 | 4,490 (36.6)                |
| Peripheral artery disease                      | 3,010 (11.9)      | 1,544 (11.9)                 | 1,466 (11.9)                |
| Hyperthyroidism within 6 months                | 269 (1.1)         | 149 (1.2)                    | 120 (1.0)                   |
| Sepsis*                                        | -                 |                              |                             |
| Pneumonia*                                     | 1,135 (4.5)       | 609 (4.7)                    | 526 (4.3)                   |
| Pulmonary embolism*                            | 247 (1.0)         | 98 (0.8)                     | 149 (1.2)                   |
| Acute respiratory distress syndrome*           | -                 |                              |                             |
| Cardiac and non-cardiac thoracic surgery*      | 408 (1.6)         | 198 (1.5)                    | 210 (1.7)                   |
| Admission to intensive care unit*              | 347 (1.4)         | 176 (1.4)                    | 171 (1.4)                   |
| Cancer within 6 months                         | 1,034 (4.1)       | 459 (3.5)                    | 575 (4.7)                   |
| <b>Medication, N (%)**</b>                     |                   |                              |                             |
| ACE inhibitor or ARB                           | 15,189 (60.1)     | 7,945 (61.1)                 | 7,244 (59.0)                |
| Beta-blocker                                   | 11,564 (45.7)     | 6,200 (47.7)                 | 5,364 (43.7)                |
| MRA                                            | 2,750 (10.9)      | 1,469 (11.3)                 | 1,281 (10.4)                |
| Statin                                         | 12,621 (49.9)     | 6,655 (51.2)                 | 5,966 (48.6)                |
| Aspirin and/or clopidogrel                     | 13,876 (54.9)     | 7,498 (57.6)                 | 6,378 (51.9)                |
| NSAID                                          | 4,171 (16.5)      | 2,368 (18.2)                 | 1,803 (14.7)                |

**Vinter et al. Prediction models for incident AF in HF**

Abbreviations: NYHA=New York Heart Association; ACE=angiotensin-converting enzyme; ARB=angiotensin receptor blockers; MRA=mineralocorticoid receptor antagonist; NSAID=non-steroidal anti-inflammatory drugs

Missing in development dataset, N (%): alcohol: 1,788 (13.7); smoking: 1,057 (8.1); LVEF: 209 (1.6); education: 550 (4.2). Missing in validation dataset, N (%): alcohol: 1,164 (9.5); smoking: 682 (5.6); LVEF: 37 (0.3); education: 295 (2.4).

\*At least 1 prescription within 6 months before HF

\*\*Within 1 month before HF

## Vinter et al. Prediction models for incident AF in HF

**Supplemental Table 5. Characteristics of complete cases based on selected variables by experts and patients diagnosed in 2008-2017.**

|                                                | <b>Total<br/>N=22,810</b> |
|------------------------------------------------|---------------------------|
| <b>Demography</b>                              |                           |
| Female sex, N (%)                              | 7,449 (32.7)              |
| Age, years, mean (SD)                          | 67.9 (12.9)               |
| Highest completed education, N (%)             |                           |
| Group 1                                        | 9,527 (32.3)              |
| Group 2                                        | 9,116 (31.4)              |
| Group 3                                        | 3,383 (15.4)              |
| <b>Lifestyle factors, N (%)</b>                |                           |
| Elevated alcohol consumption                   | 1,783 (8.9)               |
| Smoking status                                 |                           |
| Never                                          | 5,403 (25.5)              |
| Former                                         | 9,178 (32.3)              |
| Current                                        | 6,631 (31.3)              |
| <b>Clinical Data, N (%)</b>                    |                           |
| Left ventricular ejection fraction             |                           |
| <25%                                           | 5,371 (23.8)              |
| 25-40%                                         | 14,307 (63.4)             |
| >40-49%                                        | 1,446 (6.4)               |
| ≥50%                                           | 1,452 (6.4)               |
| NYHA class                                     |                           |
| I                                              | 3,649 (16.0)              |
| II                                             | 13,677 (60.0)             |
| III/IV                                         | 5,484 (24.0)              |
| <b>Comorbidities and health factors, N (%)</b> |                           |
| Hypertension                                   | 9,482 (41.6)              |
| Hypercholesterolemia                           | 4,769 (20.9)              |
| Diabetes mellitus                              | 4,626 (20.3)              |
| Chronic kidney disease                         | 1,590 (7.0)               |
| Obstructive sleep apnea                        | 489 (2.1)                 |
| Chronic obstructive pulmonary disease          | 2,848 (12.5)              |
| Valvular heart disease                         | 2,018 (8.9)               |
| Myocardial infarction                          | 8,929 (39.2)              |
| Peripheral artery disease                      | 2,741 (12.0)              |
| Hyperthyroidism within 6 months                | 254 (1.1)                 |
| Sepsis*                                        | -                         |
| Pneumonia*                                     | 1,037 (4.6)               |
| Pulmonary embolism*                            | 212 (0.9)                 |
| Acute respiratory distress syndrome*           | -                         |
| Cardiac and non-cardiac thoracic surgery*      | 374 (1.6)                 |
| Admission to intensive care unit*              | 321 (1.4)                 |
| Cancer within 6 months                         | 903 (4.0)                 |
| <b>Medication, N (%)**</b>                     |                           |
| ACE inhibitor or ARB                           | 13,688 (60.0)             |
| Beta-blocker                                   | 10,516 (46.1)             |
| MRA                                            | 2,504 (11.0)              |
| Statin                                         | 11,413 (50.0)             |
| Aspirin and/or clopidogrel                     | 12,607 (55.3)             |
| NSAID                                          | 3,831 (16.8)              |

Abbreviations: NYHA=New York Heart Association; ACE=angiotensin-converting enzyme; ARB=angiotensin receptor blockers; MRA=mineralocorticoid receptor antagonist; NSAID=non-steroidal anti-inflammatory drugs

**Vinter et al. Prediction models for incident AF in HF**

Missing in development dataset, N (%): alcohol: 2,7190 (11.9); smoking: 1,598 (7.0); LVEF: 234 (1.0); education: 784 (3.4).

## Vinter et al. Prediction models for incident AF in HF

Supplemental Figure 2. Flowchart.

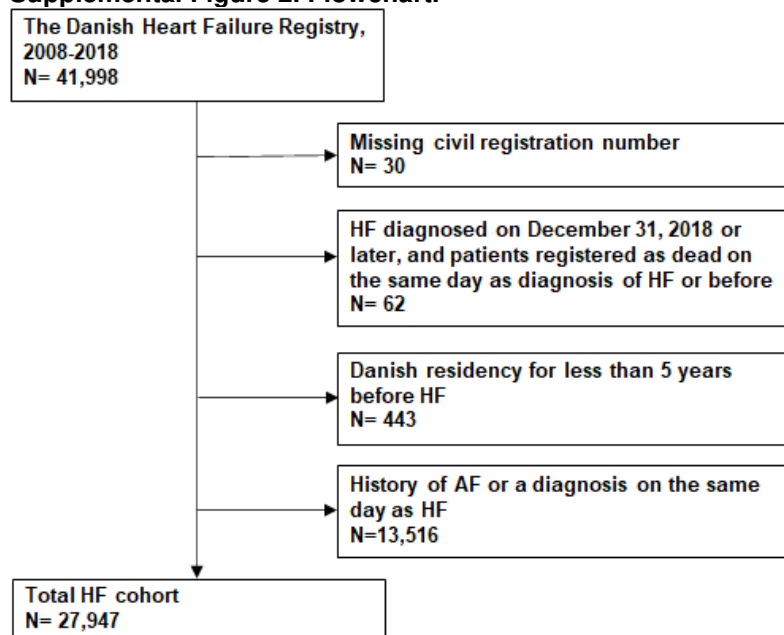

Abbreviations: HF=heart failure; AF=atrial fibrillation.

## Vinter et al. Prediction models for incident AF in HF

Supplemental Figure 3. Results of first Delphi Round.

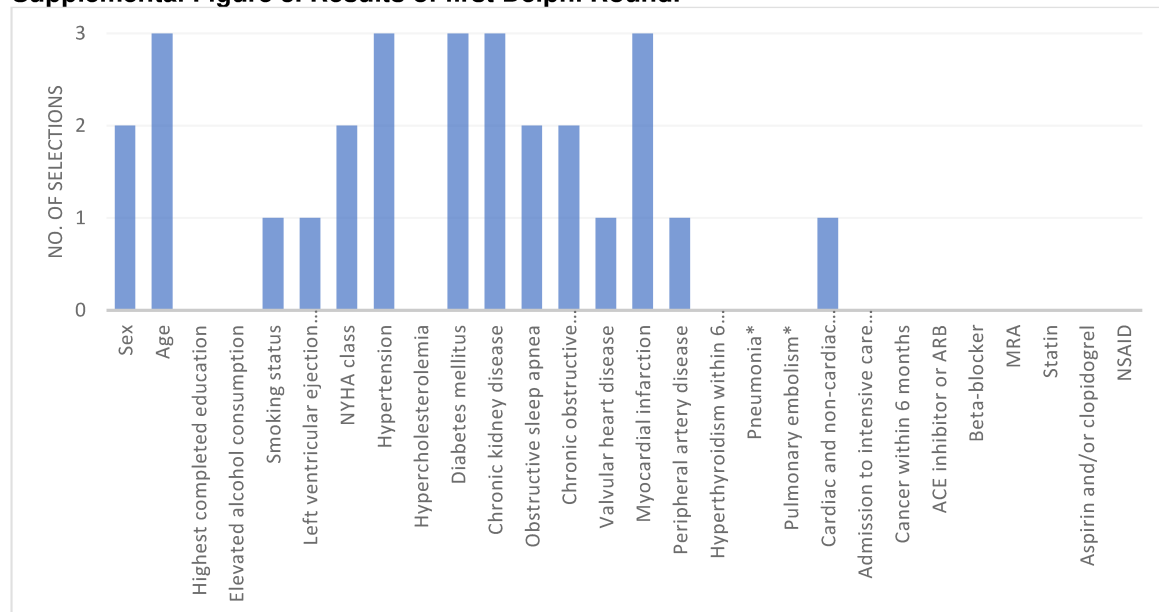

Abbreviations: NYHA=New York Heart Association; ACE=angiotensin-converting enzyme; ARB=angiotensin receptor blockers; MRA=mineralocorticoid receptor antagonist; NSAID=non-steroidal anti-inflammatory drugs

## Vinter et al. Prediction models for incident AF in HF

Supplemental Figure 4. Risk prediction of death.

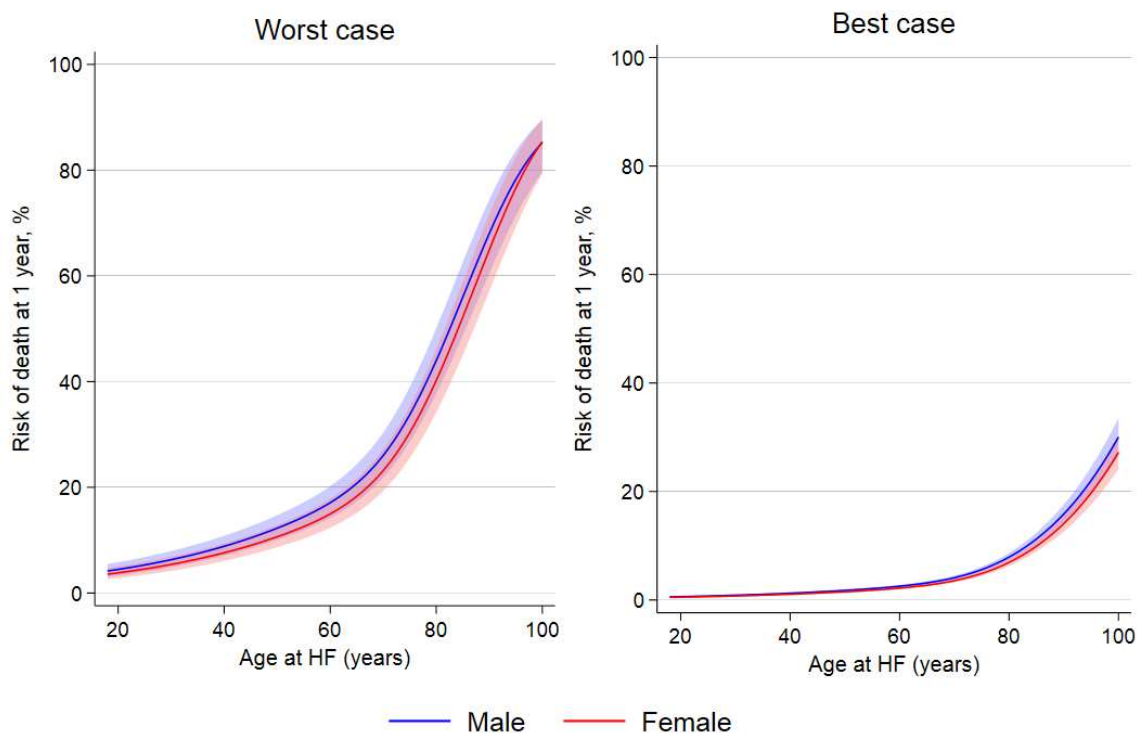

Worst case scenario: Patient has NYHA class III/IV, hypertension, diabetes mellitus, chronic kidney disease, obstructive sleep apnea, chronic obstructive pulmonary disease, and myocardial infarction. Best case scenario: Patient has NYHA class I, no hypertension, no diabetes mellitus, no chronic kidney disease, no obstructive sleep apnea, no chronic obstructive pulmonary disease, and no history of myocardial infarction.
